# Supplementary material
Source: PubMed Central journal article supplement (PMC3845171)
Supplement: 1307405110_pnas.201307405SI.pdf [file 1307405110_pnas.201307405SI.pdf]

# Supporting Information

Seong et al. 10.1073/pnas.1307405110

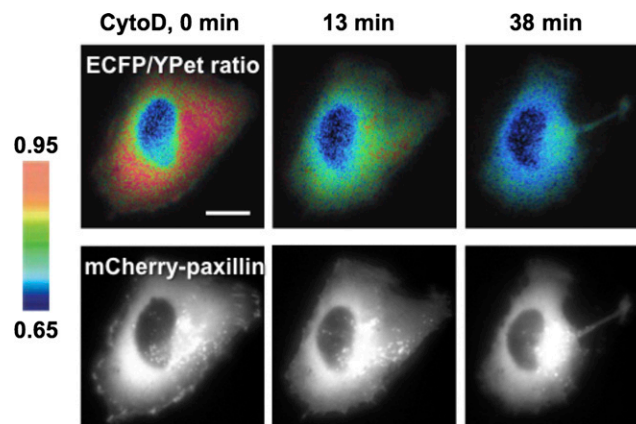

**Movie S1.** FAK activity and focal adhesion dynamics in response to cytochalasin D. Movie of the ECFP/YPet ratio images of FAK biosensor and mCherry-tagged paxillin in H1080 cells seeded on FN-coated glass surface with the treatment of 1  $\mu$ M of cytochalasin D. The ECFP/YPet ratio ranges from 0.6 to 1.0.

[Movie S1](#)

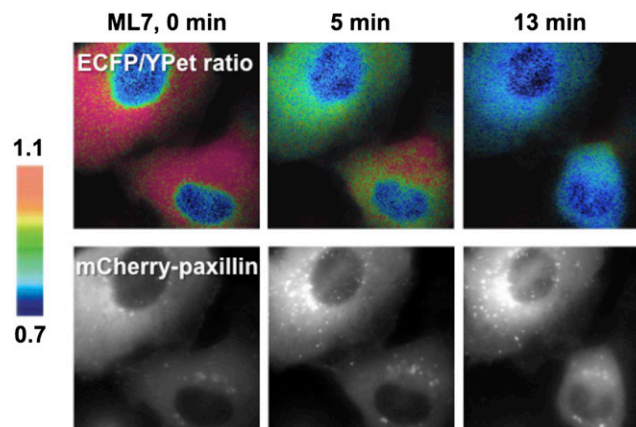

**Movie S2.** FAK activity and focal adhesion dynamics in response to ML7. Movie of the ECFP/YPet ratio images of FAK biosensor and mCherry-tagged paxillin in H1080 cells seeded on FN-coated glass surface with the treatment of 10  $\mu$ M of ML7. The ECFP/YPet ratio ranges from 0.65 to 1.25.

[Movie S2](#)

## Other Supporting Information Files

[SI Appendix \(PDF\)](#)
